# Supplementary material for: Clinic and genetic similarity assessments of atypical carcinoid, neuroendocrine neoplasm with atypical carcinoid morphology and elevated mitotic count and large cell neuroendocrine carcinoma
Source: PubMed Central journal article supplement (PMC8951721; doi:10.1186/s12885-022-09391-w), 2022-03-24
Supplement: 12885_2022_9391_MOESM1_ESM.pdf [file 12885_2022_9391_MOESM1_ESM.pdf]

Supplement 1: Gene mutation sites and affected protein changes

| Mutant gene | Cases    | Gene mutation point                | Protein mutation point           | Spacer codon |
|-------------|----------|------------------------------------|----------------------------------|--------------|
|             | 10<br>20 | c. 824G>T                          | p. C275F                         |              |
|             | 18<br>21 | c. 746G>T                          | p. R249M                         |              |
|             | 10<br>11 | c. 672G>T<br>c. 480_481delGGinsTT  | p. E224D<br>p. M160_A161delinsIS | 64           |
|             | 10<br>12 | c. 824G>T<br>c. 455delC            | p. C275F<br>p. P152RfsX18        | 123          |
|             | 10<br>18 | c. 824G>T<br>c. 746G>T             | p. C275F<br>p. R249M             | 26           |
|             | 10<br>19 | c. 824G>T<br>c. 374_375delCGinsAT  | p. C275F<br>p. T125N             | 150          |
|             | 10<br>28 | c. 672G>T<br>c. 396G>C             | p. E224D<br>p. K132N             | 92           |
|             | 11<br>28 | c. 480_481delGGinsTT<br>c. 396G>C  | p. M160_A161delinsIS<br>p. K132N | 28           |
|             | 12<br>18 | c. 455delC<br>c. 746G>T            | p. P152RfsX18<br>p. R249M        | 97           |
|             | 12<br>19 | c. 455delC<br>c. 374_375delCGinsAT | p. P152RfsX18<br>p. T125N        | 27           |
|             | 12<br>27 | c. 455delC<br>c. 428T>A            | p. P152RfsX18<br>p. V143E        | 9            |
|             | 12<br>29 | c. 455delC<br>c. 833C>G            | p. P152RfsX18<br>p. P278R        | 126          |
|             | 13<br>14 | c. 277delC<br>c. 1015G>T           | p. L93Cfs*30<br>p. E339*         | 246          |
|             | 13<br>15 | c. 277delC<br>c. 817C>T            | p. L93Cfs*30<br>p. R273          | 180          |
|             | 13<br>15 | c. 277delC<br>c. 892G>T            | p. L93Cfs*30<br>p. E298*         | 205          |
|             | 13<br>18 | c. 277delC<br>c. 538G>T            | p. L93Cfs*30<br>p. E180X         | 87           |
|             | 13<br>22 | c. 277delC<br>c. 730G>T            | p. L93Cfs*30<br>p. G244C         | 151          |
|             | 13<br>25 | c. 277delC<br>c. 202G>T            | p. L93Cfs*30<br>p. E68X          | 25           |
|             | 13<br>26 | c. 277delC<br>c. 217G>T            | p. L93Cfs*30<br>p. V73L          | 20           |
|             | 14<br>15 | c. 1015G>T<br>c. 817C>T            | p. E339*<br>p. R273              | 66           |
|             | 14       | c. 1015G>T                         | p. E339*                         | 41           |

TP53

|    |                      |          |     |
|----|----------------------|----------|-----|
| 15 | c. 892G>T            | p. E298* | 41  |
| 14 | c. 1015G>T           | p. E339* | 159 |
| 18 | c. 538G>T            | p. E180X |     |
| 14 | c. 1015G>T           | p. E339* | 95  |
| 22 | c. 730G>T            | p. G244C |     |
| 14 | c. 1015G>T           | p. E339* | 271 |
| 25 | c. 202G>T            | p. E68X  |     |
| 14 | c. 1015G>T           | p. E339* | 266 |
| 26 | c. 217G>T            | p. V73L  |     |
| 15 | c. 817C>T            | p. R273  | 25  |
|    | c. 892G>T            | p. E298* |     |
| 15 | c. 817C>T            | p. R273  | 93  |
| 18 | c. 538G>T            | p. E180X |     |
| 15 | c. 892G>T            | p. E298* | 118 |
| 18 | c. 538G>T            | p. E180X |     |
| 15 | c. 817C>T            | p. R273  | 29  |
| 22 | c. 730G>T            | p. G244C |     |
| 15 | c. 892G>T            | p. E298* | 54  |
| 22 | c. 730G>T            | p. G244C |     |
| 15 | c. 817C>T            | p. R273  | 205 |
| 25 | c. 202G>T            | p. E68X  |     |
| 15 | c. 892G>T            | p. E298* | 230 |
| 25 | c. 202G>T            | p. E68X  |     |
| 15 | c. 817C>T            | p. R273  | 200 |
| 26 | c. 217G>T            | p. V73L  |     |
| 15 | c. 892G>T            | p. E298* | 225 |
| 26 | c. 217G>T            | p. V73L  |     |
| 18 | c. 538G>T            | p. E180X | 64  |
| 22 | c. 730G>T            | p. G244C |     |
| 18 | c. 538G>T            | p. E180X | 112 |
| 25 | c. 202G>T            | p. E68X  |     |
| 18 | c. 538G>T            | p. E180X | 107 |
| 26 | c. 217G>T            | p. V73L  |     |
| 18 | c. 746G>T            | p. R249M | 29  |
| 29 | c. 833C>G            | p. P278R |     |
| 19 | c. 374_375delCGinsAT | p. T125N | 124 |
| 21 | c. 746G>T            | p. R249M |     |
| 19 | c. 374_375delCGinsAT | p. T125N | 18  |
| 27 | c. 428T>A            | p. V143E |     |
| 19 | c. 374_375delCGinsAT | p. T125N | 153 |
| 29 | c. 833C>G            | p. P278R |     |
| 20 | c. 824G>T            | p. C275F | 3   |
| 29 | c. 833C>G            | p. P278R |     |
| 21 | c. 746G>T            | p. R249M | 106 |
| 27 | c. 428T>A            | p. V143E |     |

|  |    |           |          |     |
|--|----|-----------|----------|-----|
|  | 22 | c. 730G>T | p. G244C | 176 |
|  | 25 | c. 202G>T | p. E68X  |     |
|  | 22 | c. 730G>T | p. G244C | 171 |
|  | 26 | c. 217G>T | p. V73L  |     |
|  | 25 | c. 202G>T | p. E68X  | 5   |
|  | 26 | c. 217G>T | p. V73L  |     |
|  | 27 | c. 428T>A | p. V143E | 135 |
|  | 29 | c. 833C>G | p. P278R |     |

| Mutant gene | Cases | Gene mutation point | Protein mutation point | Spacer codon |
|-------------|-------|---------------------|------------------------|--------------|
| RB1         | 15    | c. 2134T>C          | p. C712R               | 508          |
|             | 18    | c. 610G>T           | p. E204X               |              |
|             | 15    | c. 2134T>C          | p. C712R               | 257          |
|             | 21    | c. 1363C>T          | p. R455X               |              |
|             | 15    | c. 2134T>C          | p. C712R               | 51           |
|             | 22    | c. 1981C>T          | p. R661W               |              |
|             | 18    | c. 610G>T           | p. E204X               | 457          |
|             | 22    | c. 1981C>T          | p. R661W               |              |
|             | 21    | c. 1363C>T          | p. R455X               | 206          |
|             | 22    | c. 1981C>T          | p. R661W               |              |

| Mutant gene | Cases | Gene mutation point | Protein mutation point | Spacer codon |
|-------------|-------|---------------------|------------------------|--------------|
| PTEN        | 10    | c. 601G>A           | p. E201K               | 12           |
|             | 19    | c. 565A>T           | p. R189X               |              |

| Mutant gene | Cases      | Gene mutation point | Protein mutation point | Spacer codon |
|-------------|------------|---------------------|------------------------|--------------|
| KEAP1       | 10         | c. 1687C>T          | p. Q563*               | 220          |
|             | 11         | c. 1027G>T          | p. E343X               |              |
|             | 10         | c. 1687C>T          | p. Q563*               | 401          |
|             | 20         | c. 484T>A           | p. Y162N               |              |
|             | 10         | c. 1687C>T          | p. Q563*               | 150          |
|             | 25         | c. 1237C>A          | p. R413S               |              |
|             | 10         | c. 1687C>T          | p. Q563*               | 230          |
|             | 31         | c. 997G>T           | p. G333C               |              |
|             | 11         | c. 1027G>T          | p. E343X               | 10           |
|             | 31         | c. 997G>T           | p. G333C               |              |
|             | 11         | c. 1027G>T          | p. E343X               | 181          |
|             | 20         | c. 484T>A           | p. Y162N               |              |
|             | 11         | c. 1027G>T          | p. E343X               | 70           |
|             | 25         | c. 1237C>A          | p. R413S               |              |
| 20          | c. 484T>A  | p. Y162N            | 251                    |              |
| 25          | c. 1237C>A | p. R413S            |                        |              |
| 20          | c. 484T>A  | p. Y162N            | 251                    |              |
| 25          | c. 1237C>A | p. R413S            |                        |              |
| 25          | c. 1237C>A | p. R413S            | 80                     |              |
| 31          | c. 997G>T  | p. G333C            |                        |              |

| Mutant gene | Cases | Gene mutation point | Protein mutation point | Spacer codon |
|-------------|-------|---------------------|------------------------|--------------|
|-------------|-------|---------------------|------------------------|--------------|

|      |          |                         |                       |      |
|------|----------|-------------------------|-----------------------|------|
| ROS1 | 18<br>27 | c. 693G>T<br>c. 5433C>A | p. R231S<br>p. C1811X | 1580 |
|------|----------|-------------------------|-----------------------|------|

| Mutant gene | Cases    | Gene mutation point        | Protein mutation point | Spacer codon |
|-------------|----------|----------------------------|------------------------|--------------|
| PKHD1       | 11       | c. 571T>A<br>c. 8659G>T    | p. C191S<br>p. A2887S  | 2696         |
|             | 11<br>14 | c. 571T>A<br>c. 11101G>A   | p. C191S<br>p. V3701I  | 3510         |
|             | 11<br>14 | c. 8659G>T<br>c. 11101G>A  | p. A2887S<br>p. V3701I | 814          |
|             | 11<br>27 | c. 8659G>T<br>c. 10660G>A  | p. A2887S<br>p. E3554K | 667          |
|             | 11<br>27 | c. 8030C>A<br>c. 10142C>G  | p. P2677Q<br>p. S3381C | 704          |
|             | 11<br>27 | c. 571T>A<br>c. 7003A>G    | p. C191S<br>p. R2335G  | 2144         |
|             | 11<br>27 | c. 8659G>T<br>c. 7003A>G   | p. A2887S<br>p. R2335G | 552          |
|             | 11<br>27 | c. 571T>A<br>c. 10660G>A   | p. C191S<br>p. E3554K  | 3363         |
|             | 14<br>27 | c. 11101G>A<br>c. 7003A>G  | p. V3701I<br>p. R2335G | 1366         |
|             | 14<br>27 | c. 11101G>A<br>c. 10660G>A | p. V3701I<br>p. E3554K | 147          |
|             | 27       | c. 7003A>G<br>c. 10660G>A  | p. R2335G<br>p. E3554K | 1219         |

**Abberation:** Cases: cases of patients; Protein mutation point: the corresponding protein locations
