# Supplementary material for: Clinic and genetic similarity assessments of atypical carcinoid, neuroendocrine neoplasm with atypical carcinoid morphology and elevated mitotic count and large cell neuroendocrine carcinoma
Source: PubMed Central journal article supplement (PMC8951721; doi:10.1186/s12885-022-09391-w), 2022-03-24
Supplement: 12885_2022_9391_MOESM2_ESM.pdf [file 12885_2022_9391_MOESM2_ESM.pdf]

**Supplement 2: The pathways in which the top ten mutated genes are involved**

| <b>Pathway</b>                                  | <b>TP53</b> | <b>RB1</b> | <b>RICTOR</b> | <b>ROS1</b> | <b>NTRK1</b> | <b>PTEN</b> | <b>KEAP1</b> | <b>MCL1</b> | <b>APC</b> | <b>Total</b> |
|-------------------------------------------------|-------------|------------|---------------|-------------|--------------|-------------|--------------|-------------|------------|--------------|
| Pathways in cancer                              | +           | +          |               |             | +            | +           | +            |             | +          | <b>6</b>     |
| Hepatocellular carcinoma                        | +           | +          |               |             |              | +           | +            |             | +          | <b>5</b>     |
| PI3K-Akt signaling pathway                      | +           |            |               |             | +            | +           |              | +           |            | <b>4</b>     |
| MicroRNAs in cancer                             | +           |            |               |             |              | +           |              | +           | +          | <b>4</b>     |
| Human papillomavirus infection                  | +           | +          |               |             |              | +           |              |             | +          | <b>4</b>     |
| Human T-cell leukemia virus 1 infection         | +           | +          |               |             |              | +           |              |             | +          | <b>4</b>     |
| Breast cancer                                   | +           | +          |               |             |              | +           |              |             | +          | <b>4</b>     |
| Cellular senescence                             | +           | +          |               |             |              | +           |              |             |            | <b>3</b>     |
| mTOR signaling pathway                          |             | +          | +             |             |              | +           |              |             |            | <b>3</b>     |
| Central carbon metabolism in cancer             | +           |            |               |             | +            | +           |              |             |            | <b>3</b>     |
| Melanoma                                        | +           | +          |               |             |              | +           |              |             |            | <b>3</b>     |
| Prostate cancer                                 | +           | +          |               |             |              | +           |              |             |            | <b>3</b>     |
| Autophagy - animal                              | +           | +          |               |             |              | +           |              |             |            | <b>3</b>     |
| Glioma                                          | +           | +          |               |             |              | +           |              |             |            | <b>3</b>     |
| Apoptosis                                       | +           |            |               |             | +            |             |              | +           |            | <b>3</b>     |
| p53 signaling pathway                           | +           | +          |               |             |              | +           |              |             |            | <b>3</b>     |
| Small cell lung cancer                          | +           | +          |               |             |              | +           |              |             |            | <b>3</b>     |
| Gastric cancer                                  | +           | +          |               |             |              |             |              |             | +          | <b>3</b>     |
| Metabolic pathways                              |             | +          |               |             |              | +           |              |             | +          | <b>3</b>     |
| Endometrial cancer                              | +           |            |               |             |              | +           |              |             | +          | <b>3</b>     |
| Cell cycle                                      | +           | +          |               |             |              |             |              |             | +          | <b>3</b>     |
| MAPK signaling pathway                          | +           |            |               |             | +            |             |              |             |            | <b>2</b>     |
| Human cytomegalovirus infection                 | +           | +          |               |             |              |             |              |             |            | <b>2</b>     |
| Hepatitis B                                     | +           | +          |               |             |              |             |              |             |            | <b>2</b>     |
| Endocrine resistance                            | +           | +          |               |             |              |             |              |             |            | <b>2</b>     |
| Chronic myeloid leukemia                        | +           | +          |               |             |              |             |              |             |            | <b>2</b>     |
| Viral carcinogenesis                            | +           | +          |               |             |              |             |              |             |            | <b>2</b>     |
| Kaposi sarcoma-associated herpesvirus infection | +           | +          |               |             |              |             |              |             |            | <b>2</b>     |
| Non-small cell lung cancer                      | +           | +          |               |             |              |             |              |             |            | <b>2</b>     |
| JAK-STAT signaling pathway                      |             | +          |               |             |              |             |              | +           |            | <b>2</b>     |
| Pancreatic cancer                               | +           | +          |               |             |              |             |              |             |            | <b>2</b>     |
| Bladder cancer                                  | +           | +          |               |             |              |             |              |             |            | <b>2</b>     |
| Hepatitis C                                     | +           | +          |               |             |              |             |              |             |            | <b>2</b>     |
| Transcriptional misregulation in cancer         | +           |            |               |             | +            |             |              |             |            | <b>2</b>     |





|                                         |  |   |  |  |  |   |  |  |  |          |
|-----------------------------------------|--|---|--|--|--|---|--|--|--|----------|
| Methane metabolism                      |  | + |  |  |  |   |  |  |  | <b>1</b> |
| Biosynthesis of terpenoids and steroids |  |   |  |  |  | + |  |  |  | <b>1</b> |
| Nonribosomal peptide structures         |  | + |  |  |  |   |  |  |  | <b>1</b> |
| Bacterial secretion system              |  | + |  |  |  |   |  |  |  | <b>1</b> |
| Sesquiterpenoid and triterpenoid        |  |   |  |  |  | + |  |  |  | <b>1</b> |

**Abberation:** Pathway: the name of the pathway; Total: the total number of the genes involved in this pathway; +: this gene is involved in this pathway.
